# Supplementary material for: A qué se enfrenta la Comunidad Universitaria
Source: PLOS journal article supplement (doi:10.1371/journal.pone.0008590), 2012-03-10
Supplement: S8 (10.1371/journal.pone.0008590.s008) [file journal.pone.0008590.s008]

**Table S2. Primers used in this study**

| **Primer name** | **Primers for mutations of *fipA*MTB** |
| --- | --- |
| a | 5’TAGGATCCATGCAGGGGTTGGTACTGACG3’ |
| d | 5’AAGAATTCTCACGGGCGCAACTCGATTG3’ |
| e | 5’AAAAAGCTTTCACGGGCGCAACTCGATTG3’ |
| T77A b  c | 5’GGCGCGCGTATCGCGCTGAGCGAACAG3’  5’CTGTTCGCTCAGCGCGATACGCGCGCC3’ |
| S101A b  c | 5’GACGACTACGCCGCGACGCGGCACGCT3’  5’AGCGTGCCGCGTCGCGGCGTAGTCGTC3’ |
| H104A b  c | 5’GCCTCGACGCGGGCCGCTCGGCTGTCT3’  5’AGACAGCCGAGCGGCCCGCGTCGAGGC3’ |
| D118A b  c | 5’TGGTACGTCGAAGCTCTAGGATCGACC3’  5’GGTCGATCCTAGAGCTTCGACGTACCA3’ |
| N123A b  c | 5’CTAGGATCGACCGCCGGCACTTACCTG3’  5’CAGGTAAGTGCCGGCGGTCGATCCTAC3’ |
|  | **Primer for mutations of *ftsZ*MTB** |
| Primer a | 5’TAGGATCCATATGACCCCCCCGCACAACTA3’ |
| Primer d | 5’TTTGTCAATTGCTCTCAGCGGCGCATGAAG3’ |
| T343A b  c | 5’AAGCTCACCTCGGCCTTGTTCGAGCCG3’  5’CGGCTCGAACAAGGCCGAGGTGAGCTT3’ |
|  | **Primers for expression of *ftsQ*MTB** |
| sense | 5’AAAGGATCCATGACGGAACACAACGAG3’ |
| antisense | 5’AAAAAGCTTGTATTTCACGGTCGGCAGGTC3’ |
|  | **Primers for mutation of the kinase domain of *pknA*MTB** |
| sense | 5’AAAGGATCCTACCGCCTGCAGCGCCTC3’ |
| antisense | 5’AAAGAATTCTCACGCTGCCACCGCGTC3’ |
| K42A b  c | 5’CGTGTTGCGGTGGCGGTGCTCAAGAGC3’  5’GCTCTTGAGCACCGCCACCGCAACACG3’ |
|  | **Primer for expression of *pstP*MTB** |
| sense | 5’TAGGATCCAATGAGCCCCCGAGTTGGG3’ |
| antisense | 5’TAAAAGCTTTCAGTCGACGACGTCGGCG3’ |
|  | **Primers for inactivation of *fipA*MSMEG** |
| FipA 1F sense | 5’TTTAAGCTTTCCGGTCGTGACTACGAGT3’ |
| FipA 1F antisense | 5’5’ATGGATCCCGTACCACTCAGAACCTC3’ |
| FipA 2F sense | 5’ATGGATCCGTCGAGGACCTCGGATCG3’ |
| FipA 2F antisense | 5’ATGAATTCTTAATTAAACAGCAGGTAGCG3’ |
|  | **Primers for replacement of *ftsZ* in *M. smegmatis* with *ftsZ*MTB** |
| FtsZ 1F sense | 5’TAGGATCCGATGCCCTCGCCGAACGGGTC3’ |
| FtsZ 1F antisense | 5’TAGAATTCGCCGCCGGTACCGGTGCCGCC3’ |
| FtsZ 2F sense | 5’TAGAATTCGAGGCCGCCTCGCTCGTGCAG3’ |
| FtsZ 2F antisense | 5’TATAAGCTTCAGCTGGGCCGTGCGGTCCG3’ |
|  | **Primers for antisensing of *pknA*MSMEG** |
| pknA sense | 5’TAGGATCCTCATCGCTGTATCTGTTCGGA3’ |
| pknA antisense | 5’ATCATGAGCCCGCGCGTTGGAGTCACGCT3’ |
|  | **Primers for antisensing of *fipA*MTB** |
| FipA­MTB sense | 5’GATATCCATATGCAGGGGTTGGTACTG3’ |
| FipA­MTB sense | 5’ATGGATCCTCACGGGCGCAACTCGATTG3’ |
